# Supplementary material
Source: HighWire-hosted journal article supplement (https://bjo.bmj.com/content/bjophthalmol-2021-319118)
Supplement: inline-supplementary-material-1 [file inline-supplementary-material-1.pdf]

## Supplementary Tables

| <b>Table S1. Ocular Survival ratios with Standard Deviation – Group D and E</b> |                                |             |             |
|---------------------------------------------------------------------------------|--------------------------------|-------------|-------------|
| Enucleation-free ratio ± Standard Deviation                                     |                                |             |             |
| <b>Group D</b>                                                                  | <b>Follow-up time (months)</b> | <b>LN</b>   | <b>SN</b>   |
|                                                                                 | 12                             | 100.0%±0.0% | 100.0%±0.0% |
|                                                                                 | 24                             | 100.0%±0.0% | 80.0%±17.9% |
|                                                                                 | 48                             | 100.0%±0.0% | 80.0%±17.9% |
| <b>Group E</b>                                                                  | <b>Follow-up time (months)</b> | <b>LN</b>   | <b>SN</b>   |
|                                                                                 | 12                             | 100.0%±0.0% | 85.6%±7.5%  |
|                                                                                 | 24                             | 100.0%±0.0% | 64.5%±10.8% |
|                                                                                 | 48                             | 80.0%±9.1%  | 36.3%±14.2% |

“LN” refers to group of patients with an OA diameter larger than 0.65mm; “SN” refers to group of patients with an OA diameter smaller than 0.65mm

**Table S2. Log rank (Mantel-cox) analysis of ophthalmic artery stenosis and occlusion**

| Log rank                | Stage   | Sig.  | Log rank                   | Stage   | Sig.  |
|-------------------------|---------|-------|----------------------------|---------|-------|
| <b>OA<br/>occlusion</b> | Group D | 0.063 | <b>Ocular<br/>Survival</b> | Group D | 0.761 |
|                         | Group E | 0.001 |                            | Group E | 0.081 |

**Table S3. Area under the ROC curve (AUC)**

|                                        |                    |
|----------------------------------------|--------------------|
| <b>Area under the ROC curve (AUC)</b>  | <b>0.654</b>       |
| <b>Standard Error a</b>                | 0.0627             |
| <b>95% Confidence interval b</b>       | 0.555 to 0.743     |
| <b>z statistic</b>                     | 2.451              |
| <b>Significance level P (Area=0.5)</b> | 0.0143             |
| <b>Youden index J</b>                  | <b>0.3647</b>      |
| <b>Associated criterion</b>            | $\leq 0.633921567$ |
| <b>Sensitivity</b>                     | 76.47              |
| <b>Specificity</b>                     | 60.00              |
| <b>Group D</b>                         |                    |
| <b>Youden index J</b>                  | <b>0.7407</b>      |
| <b>Associated criterion</b>            | $\leq 0.55958346$  |
| <b>Sensitivity</b>                     | 100.00             |
| <b>Specificity</b>                     | 74.07              |
| <b>Group E</b>                         |                    |
| <b>Youden index J</b>                  | <b>0.3515</b>      |
| <b>Associated criterion</b>            | $\leq 0.633921567$ |
| <b>Sensitivity</b>                     | 73.33              |
| <b>Specificity</b>                     | 61.82              |
